# Supplementary material for: Genetic Determinants in Salmonella enterica Serotype Typhimurium Required for Overcoming In Vitro Stressors in the Mimicking Host Environment
Source: PubMed Central journal article supplement (PMC8653844; doi:10.1128/spectrum.00155-21), 2021-12-08
Supplement: spectrum.00155-21-s0002.pdf [file spectrum.00155-21-s0002.pdf]

## Supplemental Materials

### **Genetic determinants in *Salmonella enterica* serotype Typhimurium required for overcoming *in vitro* stressors in the mimicking host environment**

Rabindra K. Mandal<sup>1\*</sup>, Tieshan Jiang<sup>1</sup> and Young Min Kwon<sup>1,2</sup>

<sup>1</sup>Department of Poultry Science, University of Arkansas, Fayetteville, AR, 72701

<sup>2</sup>Cell and Molecular Biology Program, University of Arkansas, Fayetteville, AR, 72701

\*Corresponding author's current address:

Ryan White Center for Pediatric Infectious Diseases and Global Health

Department of Pediatrics

Indiana University School of Medicine

1044 West Walnut Street | R4 451A

Indianapolis, IN 46202

Phone: (479) 276-2203

rmandal@iu.edu

**Figure S1.** Preparation of Tn-seq amplicon library for Illumina sequencing. **(A)** Genomic DNA of Tn5 mutant library was linearly extended using Tn-specific primer1 (Ez-Tn5 primer3 in **Table S1**). Then C-tail was attached to the 3' end of purified single-stranded DNA. The C-tailed product was purified and exponential PCR was performed using Tn-specific primer2 (Barcoded primers, IR2-IS-B7~B15, in **Table S1**) and C-tail specific primer (HTM-Primer in **Table S1**) with the attached Illumina adapters). **(B)** Exponentially amplified DNA was then run on 1.5% agarose gel. DNA from 300bp to 500bp was extracted from the gel and sent for Illumina HiSeq sequencing. [M: Hi-Lo DNA marker; 1, 2, 3, 4: Tn5 mutant libraries; and C: negative control (*S. Typhimurium* 14028s wild type)].

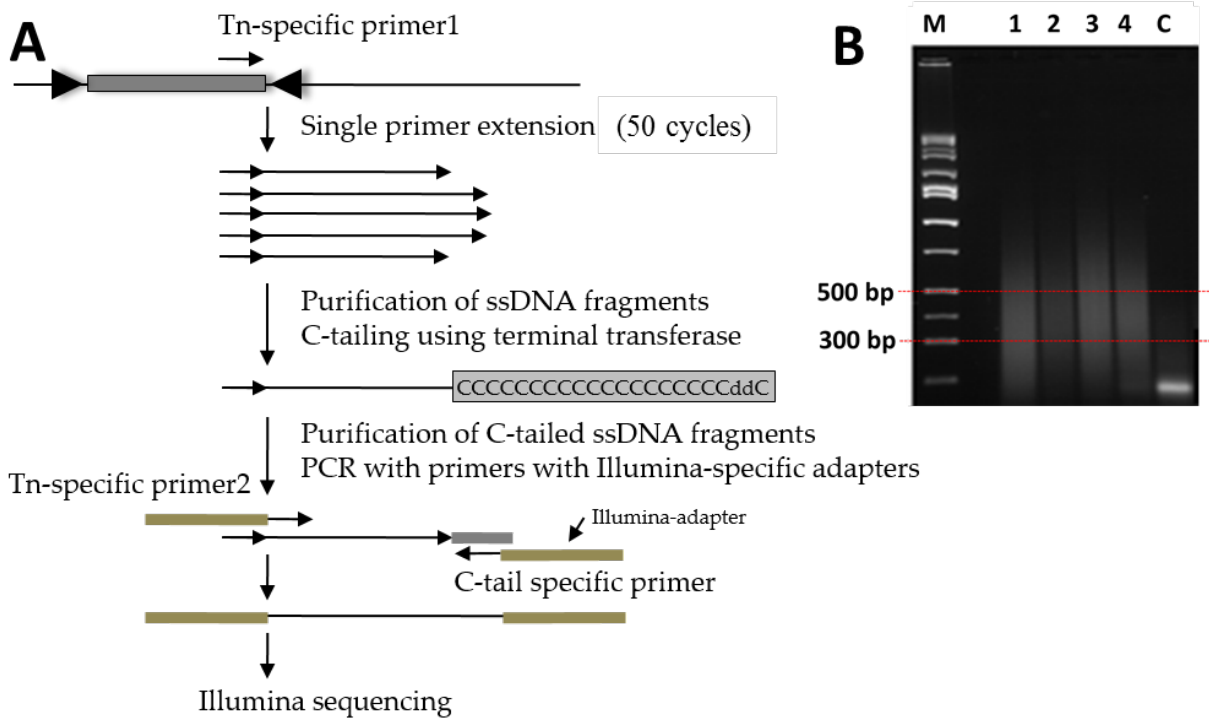

**Figure S2.** Growth curves of *S. Typhimurium* 14028s wild type in LB medium (Control), LB-propionate, LB-NaCl, and LB- H<sub>2</sub>O<sub>2</sub>. LB-propionate, LB-NaCl, and LB- H<sub>2</sub>O<sub>2</sub> represent LB media supplemented with 100 mM propionate, 3% NaCl, and 1 mM H<sub>2</sub>O<sub>2</sub>, respectively. OD<sub>600</sub> was monitored every 10 min using Tecan Infinite M200 plate reader (Tecan Trading AG, Switzerland) during incubation at 37°C with shaking (200 rpm) for 24 hrs.

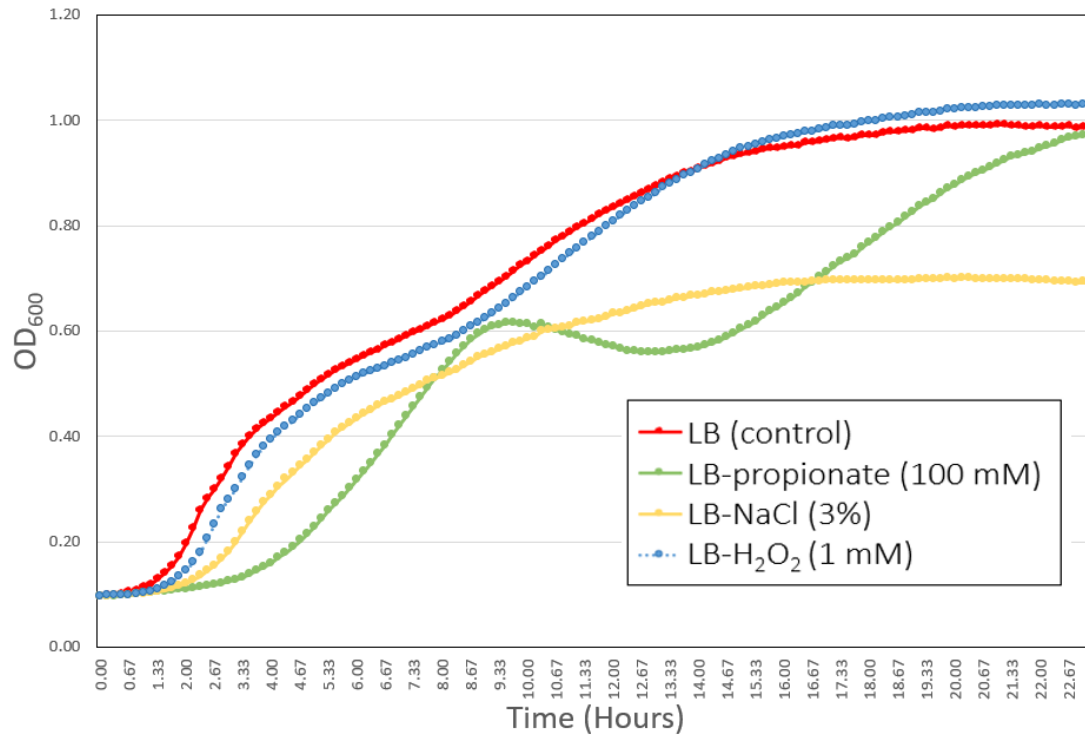

**Figure S3.** Summary of the Illumina sequencing reads and comparison among the Tn5 mutant libraries. **(A)** The bar graph shows the number of the Illumina sequencing reads in each Tn5 libraries: after barcode sorting (blue color), unique insertions (orange), mean (grey) and median reads (yellow) for each unique insertion. **(B)** The scatter plots display the Spearman correlation ( $R^2$ ) between a pair of the indicated Tn5 mutant libraries based on read count per 100bp window across the genome ( $p < 0.0001$ ).

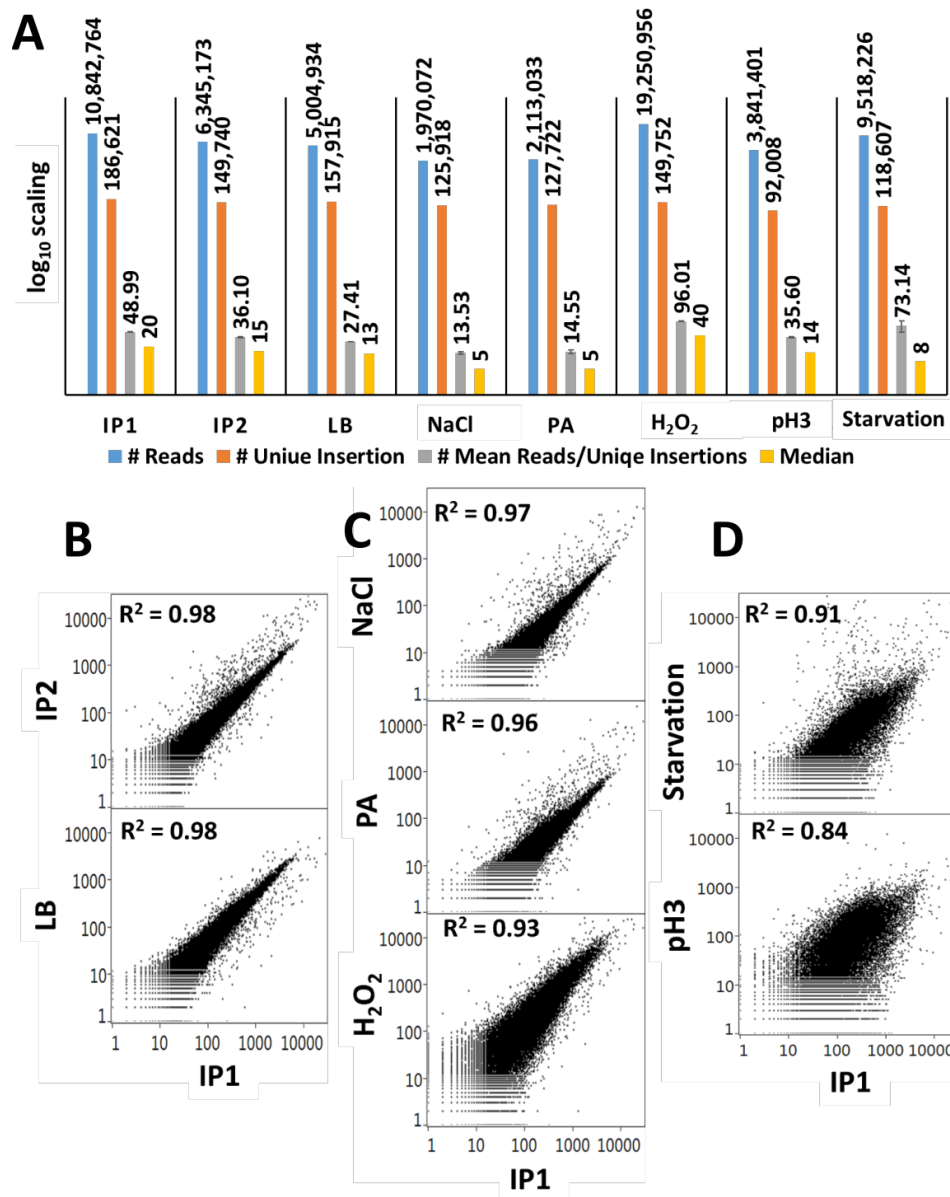

**Figure S4.** Overlay plot displays global view of genome-wide quantitative distribution of Tn5 insertion read count for all samples. X-axis: the genomic coordinates and Y-axis: Number of read count per 100 bp scaled in  $\log_{10}$ .

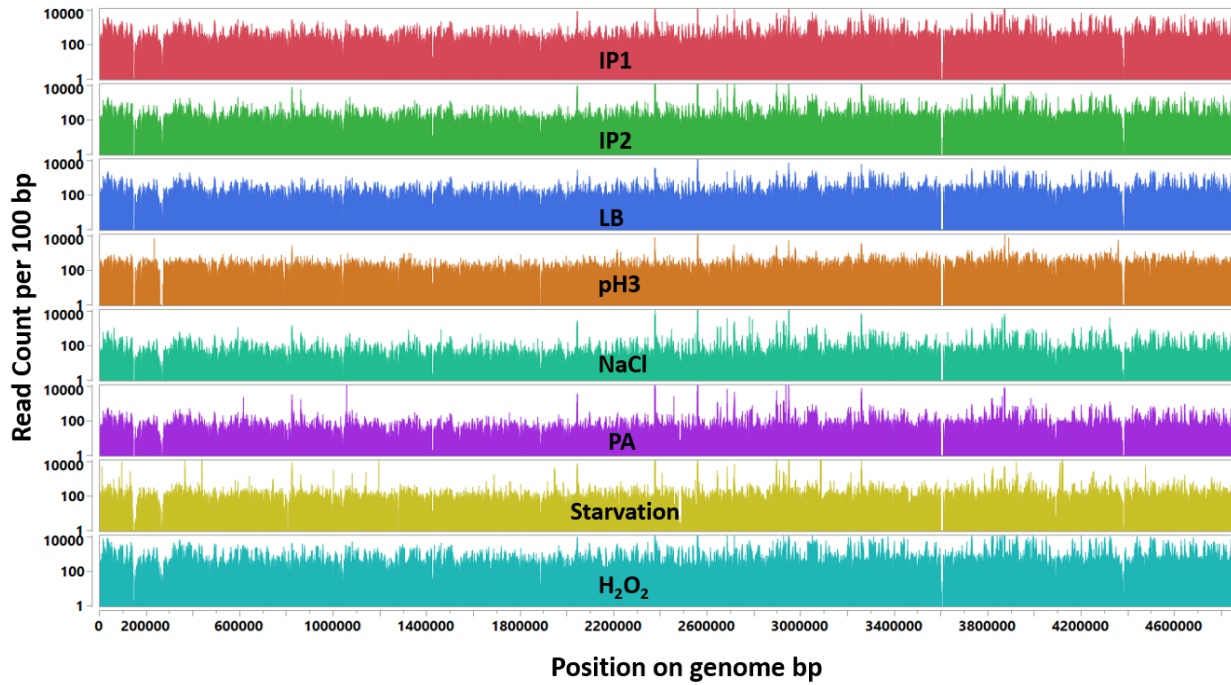

**Figure S5.** The Tn-seq profiles around the selected genomic regions. **(A)** *Salmonella* pathogenicity island 1 (SPI-1) genes encoding type III secretion system (TTSS). Screen shot image produced using Integrative Genomics Viewer (IGV) showing raw read coverage [100-600] in the 7 conditions. (Blue asterisk: conditionally essential in NaCl and Starvation; and Red asterisk: conditionally essential in Starvation only). **(B)** CpxAR were conditionally essential in Starvation only.

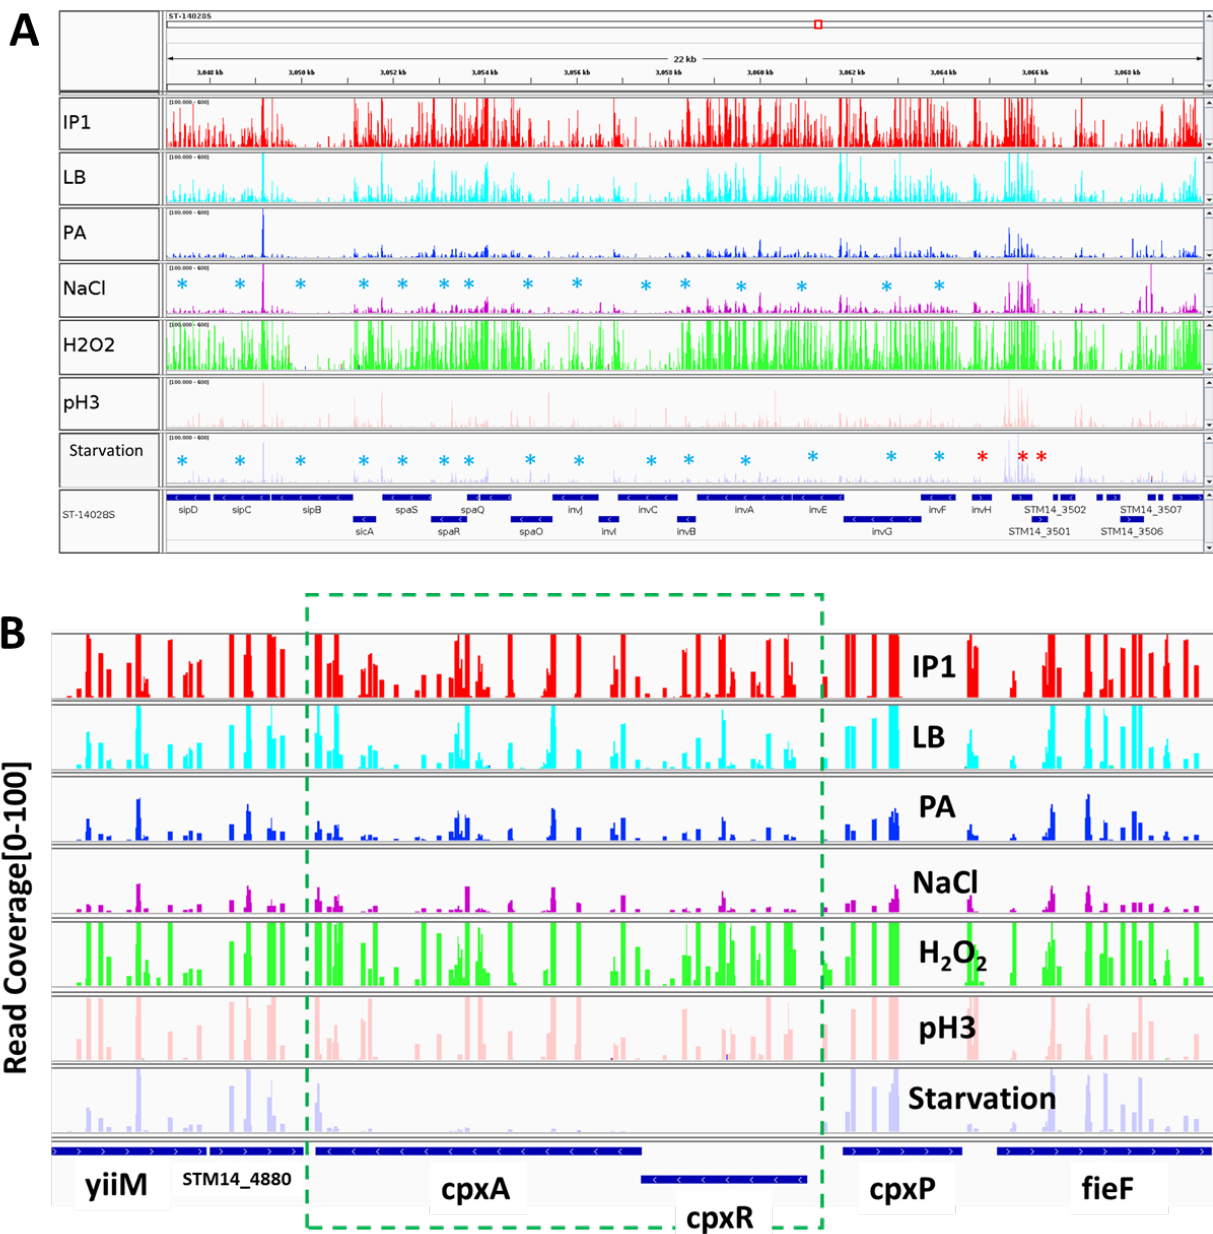

**Figure S6.** Comparison of the overlapping set of the conditionally essential genes of *S. Typhimurium* 14028s (this study) with the essential genes of *S. Typhimurium* SL3261 and *S. Typhimurium* LT2 identified in previous studies.

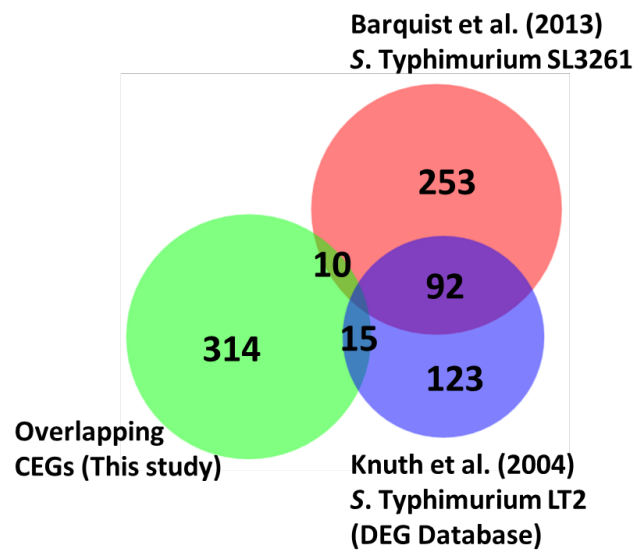

**Figure S7.** Venn diagram showing the total of 339 conditionally essential genes (CEGs) in *S. Typhimurium* 14028s identified in this study that are required for fitness in at least one of the five stress conditions (PA, NaCl, H<sub>2</sub>O<sub>2</sub>, Starvation, and pH3)

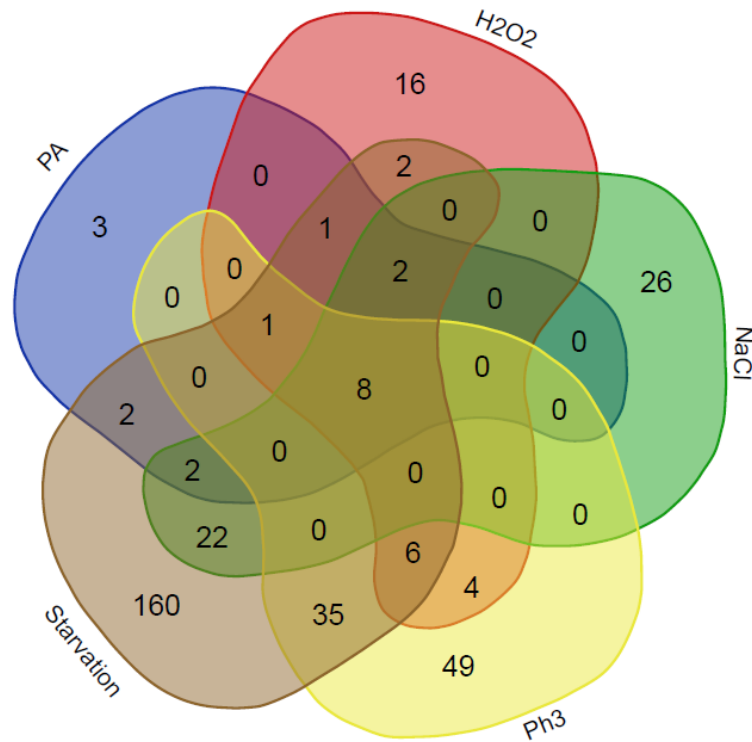



**Figure S8.** Genes required for enteric infection, systemic infection and *in vitro* fitness. Venn diagram shows the number of the shared genes between *in vitro* vs *in vivo* (Enteric) (135 CEGs shown in **Figure 4**) and *in vitro* vs *in vivo* (Systemic) (130 CEGs shown **Figure 5**). The list of 44 genes required for all *in vitro* fitness, enteric infection and systemic infection are shown in **Table 1**.

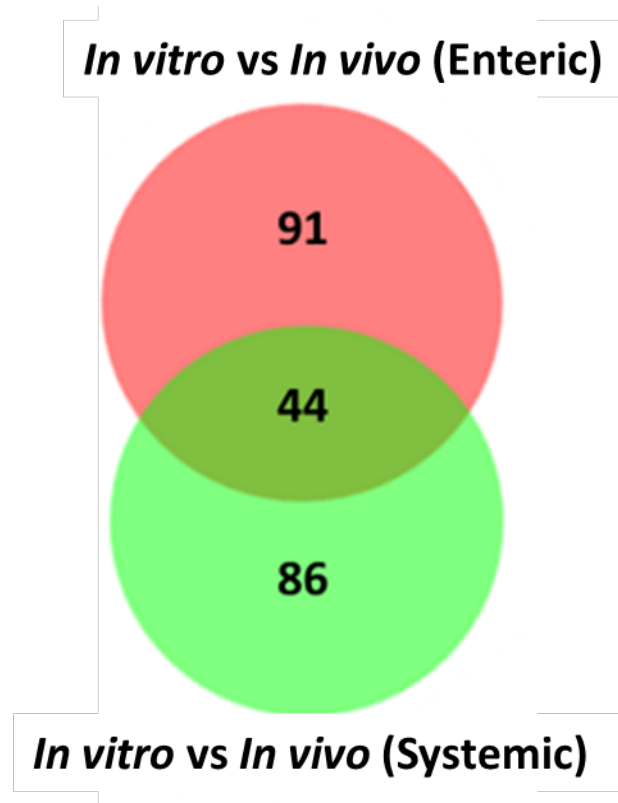

## List of Supplementary Tables

**Table S1.** Oligonucleotides used in this study.

**Table S2.** All conditionally essential genes (CEGs) in *S. Typhimurium* 14028s identified in this study.

**Table S3.** Comparison of the conditionally essential genes (CEGs) in *S. Typhimurium* 14028s identified in this study across the 5 stress conditions.

**Table S4.** The conditionally essential genes (CEGs) in *S. Typhimurium* 14028s identified in this study that are located in Salmonella Pathogenicity Islands.

**Table S5.** Comparison of the conditionally essential genes (CEGs) of *S. Typhimurium* 14028s identified in this study with the essential genes of *S. Typhimurium* identified from previous studies

**Table S6.** The conditionally essential genes (CEGs) required for growth (PA, NaCl, Bile and LB42) or survival (pH3) in the presence of the *in vitro* host stressors that are also required for enteric infection in farm animals (cattle, pig, and chicken)

**Table S7.** The conditionally essential genes (CEGs) required for growth (H<sub>2</sub>O<sub>2</sub>, NaCl, and dLB) or survival (pH3 and starvation) in the presence of the *in vitro* host stressors that are also required for systemic infection (MΦ, A-Mice, P-Mice, and Sp-Liv).
